# Supplementary material
Source: PubMed Central journal article supplement (PMC11097752)
Supplement: NIHMS1922355-supplement-bi-2021-00414z_SI.pdf [file NIHMS1922355-supplement-bi-2021-00414z_SI.pdf]

## Supplemental Information

### **Pan-3C Protease Inhibitor Rupintrivir Binds SARS-CoV-2 Main Protease in a Unique Binding Mode**

*Gordon J. Lockbaum, Mina Henes, Jeong Min Lee, Jennifer Timm, Ellen A. Nalivaika, Paul R. Thompson, Nese Kurt Yilmaz, Celia A. Schiffer\**

Department of Biochemistry and Molecular Pharmacology, University of Massachusetts Medical School, Worcester, Massachusetts 01605, United States

\*Corresponding author. Email: [Celia.Schiffer@umassmed.edu](mailto:Celia.Schiffer@umassmed.edu)

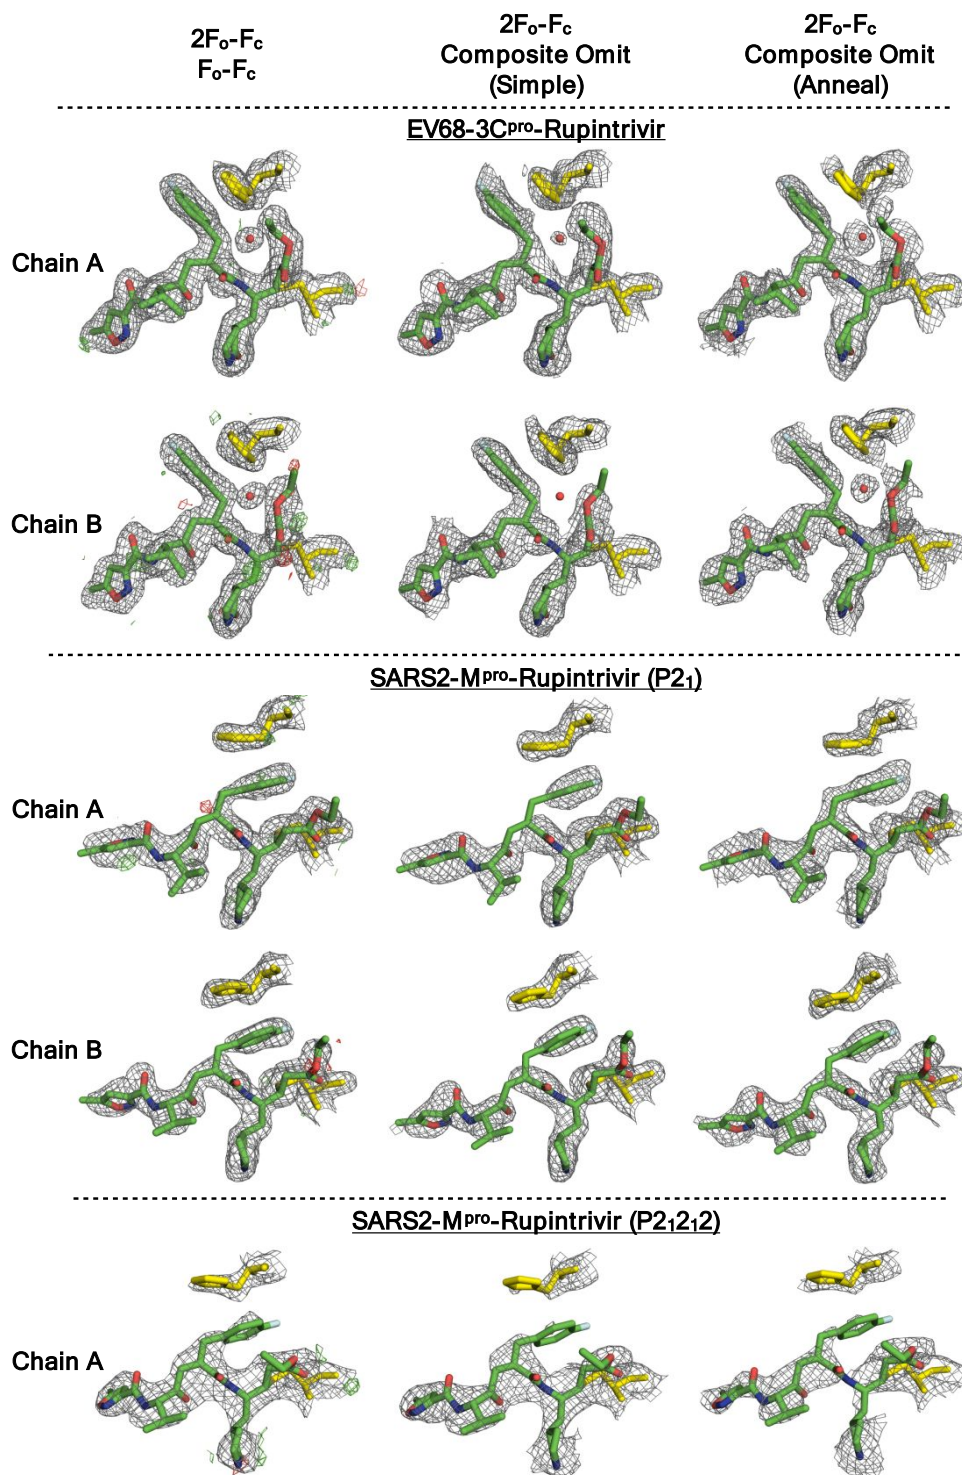

**Figure S1.** Evidence that the inhibitor and side chains were modeled correctly. Electron density maps around rupintrivir and the catalytic residues, shown as green and yellow sticks, respectively. The  $2F_o-F_c$  direct maps are depicted as grey mesh contoured at  $1.0\sigma$  while the  $F_o-F_c$  difference maps have positive density depicted as green mesh contoured at  $3.0\sigma$  and negative density as red mesh contoured at  $-3.0\sigma$ . PDB: L78H (top), 7L8I (middle), 7L8J (bottom).

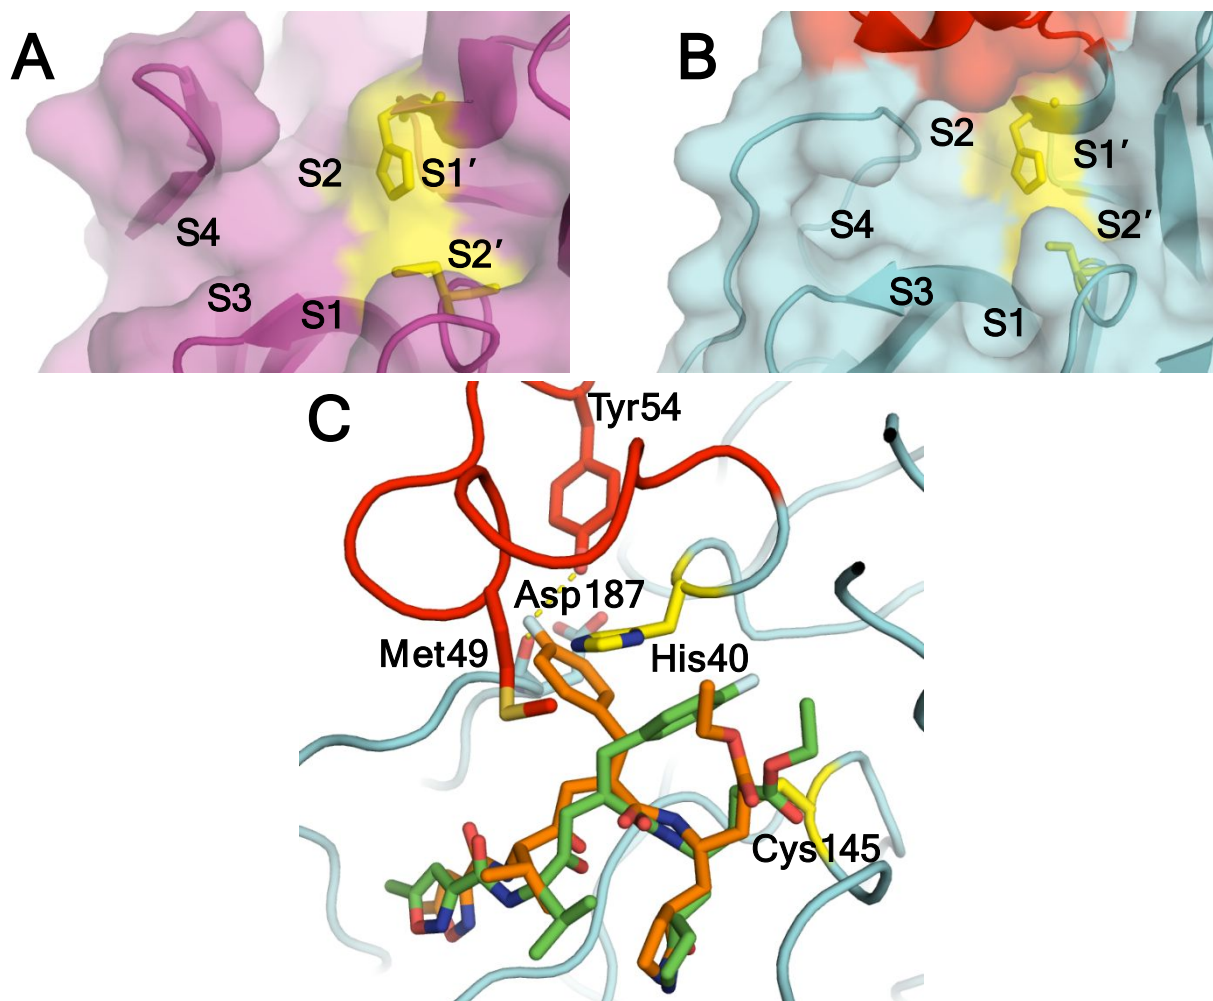

**Figure S2.** **A)** Human rhinovirus 3C<sup>pro</sup> active site with subsites labeled and catalytic residues shown as sticks and colored yellow (PDB 1CQQ). **B)** SARS-CoV-2 M<sup>pro</sup> active site with subsites labeled and catalytic residues shown as sticks and colored yellow, and residues 43-63 colored red (PDB: 3L0D). **C)** Alignment of rupintrivir (orange sticks) from the EV68 3C<sup>pro</sup> bound structure onto SARS-CoV-2 M<sup>pro</sup> active site with bound rupintrivir (green sticks) shows that although there are some polar atoms in the S2 subsite of SARS-CoV-2 M<sup>pro</sup> such as Tyr54 and the backbone carbonyl oxygen of Asp187, there is a lack of space and flexibility to optimize those interactions to accommodate the canonical 3C<sup>pro</sup> binding mode.

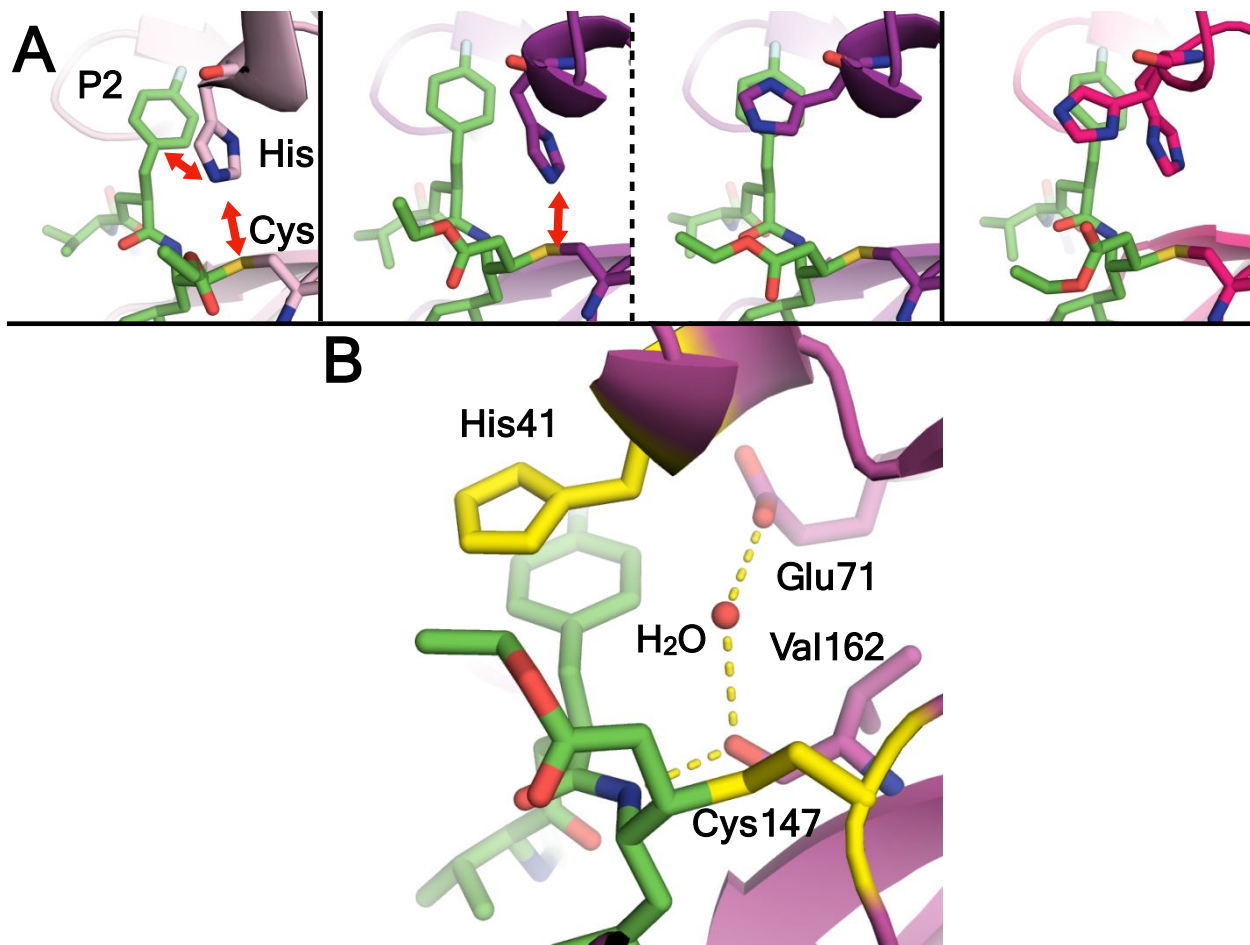

**Figure S3. A)** Previously published 3C proteases show the catalytic histidine modeled either: near the catalytic cysteine, in an orientation that creates pi-pi stacking, or in both conformations (PDB: (PDB: 1CQQ, 3SJO [chain B and chain A], and 3ROU). **B)** Our EV68 3C<sup>pro</sup>-rupintrivir complex includes a crystallographic water molecule that creates a water-mediated salt bridge between the side chain of Glu75 and the main chain carbonyl oxygen of Val162.

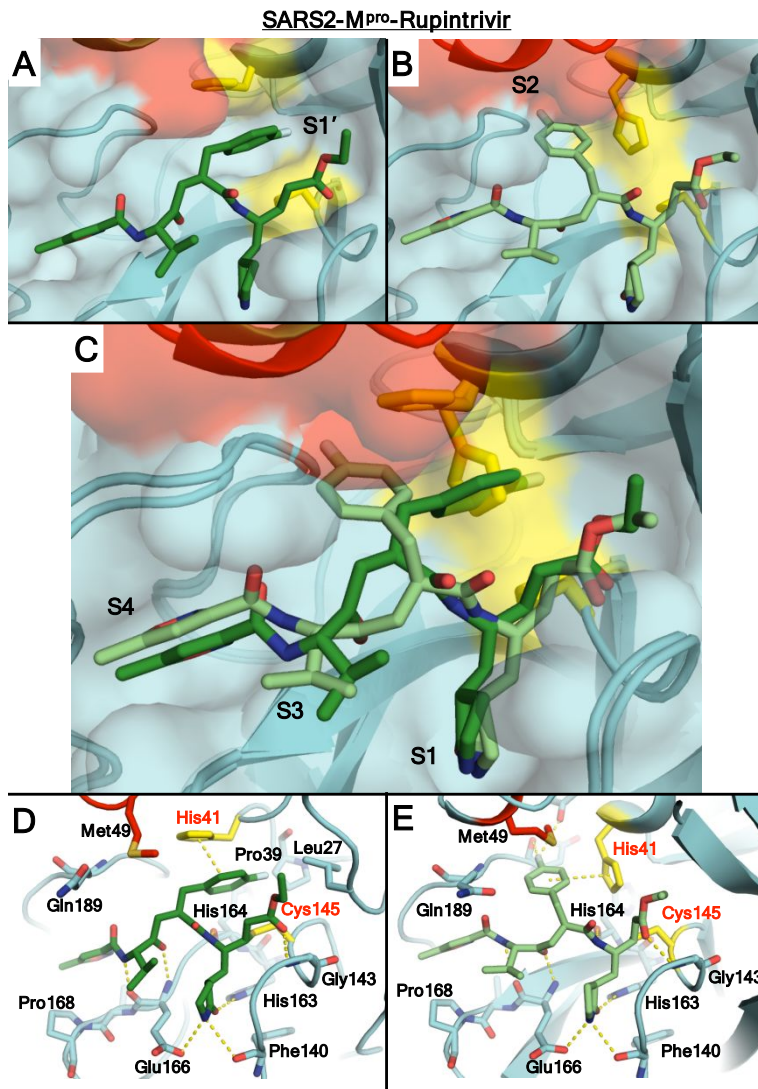

**Figure S4.** Comparison of rupintrivir binding mode in **A**) the crystal structure presented here (PDB ID: 7L8I), and **B**) another recent structure (PDB ID: 7P35). **C**) Overlay of rupintrivir in the two structures. **D, E**) Residues involved in inhibitor interactions are indicated.

**Table S1.** X-ray data collection and crystallographic refinement statistics. Values in parentheses are for the highest resolution shell.

| Protein                                     | EV68-3C <sup>pro</sup>       | SARS2-3CL <sup>pro</sup>     | SARS2-3CL <sup>pro</sup>         |
|---------------------------------------------|------------------------------|------------------------------|----------------------------------|
| Inhibitor                                   | rupintrivir                  | rupintrivir                  | rupintrivir                      |
| PDB ID                                      | 7L8H                         | 7L8I                         | 7L8J                             |
| <b>Data Collection</b>                      |                              |                              |                                  |
| Wavelength (Å)                              | 0.9200                       | 1.54178                      | 0.9200                           |
| Space group                                 | R3                           | P12 <sub>1</sub> 1           | P2 <sub>1</sub> 2 <sub>1</sub> 2 |
| <i>a</i> , <i>b</i> , <i>c</i> (Å)          | 80.9, 80.9, 197.2            | 47.8, 106.4, 54.1            | 44.9, 62.1, 107.2                |
| $\alpha$ , $\beta$ , $\gamma$ (°)           | 90, 90, 120                  | 90, 103.1, 90                | 90, 90, 90                       |
| Resolution (Å)                              | 40.3 - 1.95<br>(2.02 - 1.95) | 23.6 - 2.10<br>(2.18 - 2.10) | 41.4 - 2.45<br>(2.54 - 2.45)     |
| Total Reflections                           | 161095 (16113)               | 97350 (7445)                 | 66115 (6597)                     |
| Unique Reflections                          | 34962 (3510)                 | 28161 (2360)                 | 11556 (1145)                     |
| Redundancy                                  | 4.6 (4.6)                    | 3.5 (3.2)                    | 5.7 (5.8)                        |
| Completeness (%)                            | 99.7 (98.7)                  | 92.2 (78.1)                  | 99.7 (99.7)                      |
| Average <i>I</i> / $\sigma$                 | 12.8 (3.1)                   | 9.1 (3.1)                    | 10.0 (3.9)                       |
| <i>R</i> <sub>merge</sub> <sup>a</sup>      | 0.077 (0.650)                | 0.086 (0.385)                | 0.125 (0.576)                    |
| <i>R</i> <sub>pim</sub>                     | 0.041 (0.340)                | 0.054 (0.248)                | 0.058 (0.237)                    |
| CC 1/2                                      | 0.996 (0.689)                | 0.994 (0.790)                | 0.992 (0.926)                    |
| <b>Refinement</b>                           |                              |                              |                                  |
| Molecules in A.U.                           | 2                            | 2                            | 1                                |
| Twin Law                                    | h, -h-k,-l                   | -                            | -                                |
| Twin Fraction                               | 0.390                        | -                            | -                                |
| <i>R</i> <sub>factor</sub> (%) <sup>c</sup> | 15.8                         | 20.6                         | 22.4                             |
| <i>R</i> <sub>free</sub> (%) <sup>d</sup>   | 18.6                         | 26.3                         | 28.1                             |
| RMSD <sup>b</sup> in:                       |                              |                              |                                  |
| Bond lengths (Å)                            | 0.004                        | 0.003                        | 0.010                            |
| Bond angles (°)                             | 0.640                        | 0.540                        | 0.870                            |
| Ramachandrans:                              |                              |                              |                                  |
| Favored (%)                                 | 94.55                        | 96.86                        | 96.37                            |
| Allowed (%)                                 | 4.90                         | 2.64                         | 3.30                             |
| Outliers (%)                                | 0.54                         | 0.50                         | 0.33                             |
| B-factors:                                  |                              |                              |                                  |
| Average                                     | 35.91                        | 36.22                        | 60.67                            |
| Macromolecules                              | 35.57                        | 35.97                        | 60.68                            |
| Ligands                                     | 30.07                        | 40.24                        | 69.58                            |
| Solvent                                     | 41.12                        | 38.74                        | 51.36                            |

<sup>a</sup> $R_{sym} = \sum |I - \langle I \rangle| / \sum I$ , where *I* = observed intensity,  $\langle I \rangle$  = average intensity over symmetry equivalent

<sup>b</sup>RMSD, root mean square deviation.

<sup>c</sup> $R_{factor} = \sum ||F_o| - |F_c|| / \sum |F_o|$ .

<sup>d</sup> $R_{free}$  was calculated from 5% of reflections, chosen randomly, which were omitted from the refinement process.
